# Supplementary material for: Increased risk of infection with SARS-CoV-2 Beta, Gamma, and Delta variant compared to Alpha variant in vaccinated individuals
Source: bioRxiv or medRxiv preprint supplement (doi:10.1101/2021.11.24.21266735), 2021-11-24
Supplement: Supplementary file [file media-1.pdf]

## Supplementary information

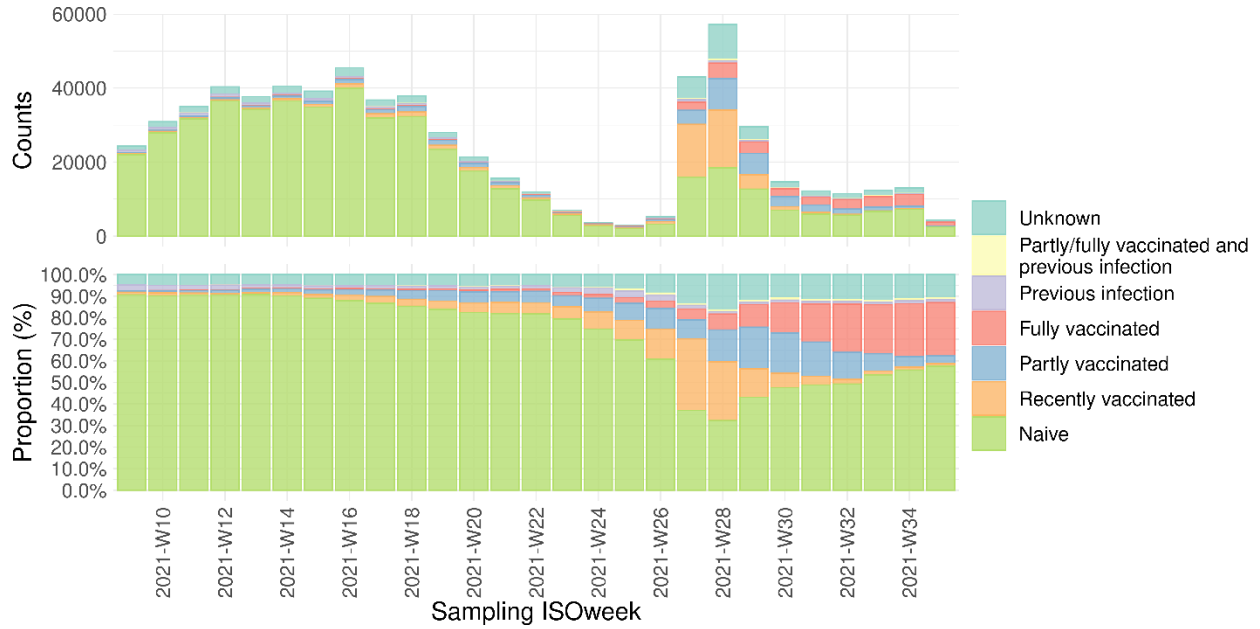

**Supplementary Figure 1** Immune status of notified SARS-CoV-2 cases in the Netherlands. Number of naïve (unvaccinated and no known previous infection), recently vaccinated, partly vaccinated, fully vaccinated, reinfected, partly/fully vaccinated and reinfected, and unknown documented SARS-CoV-2 positive individuals from March 1 to August 31, 2021 (upper panel) and proportion of the respective groups (lower panel).

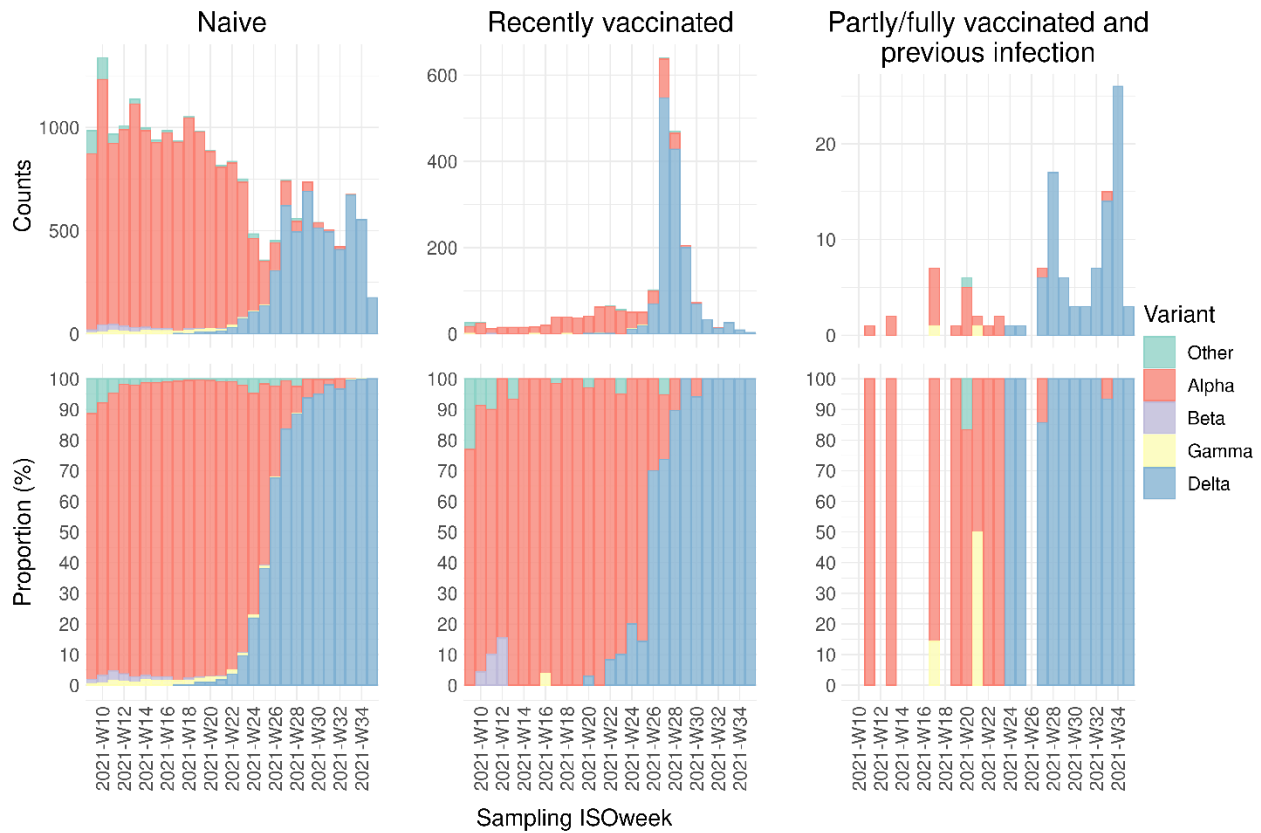

**Supplementary Figure 2** Variants found in SARS-CoV-2 positive samples of individuals with naïve (unvaccinated and no known previous infection), recently vaccinated, or vaccine-induced and infection-induced immune status. Number of naïve, recently vaccinated, partly/fully vaccinated and reinfected documented SARS-CoV-2 positive individuals by variant from March 1 to August 31, 2021 (upper panel) and proportion of the respective groups (lower panel).

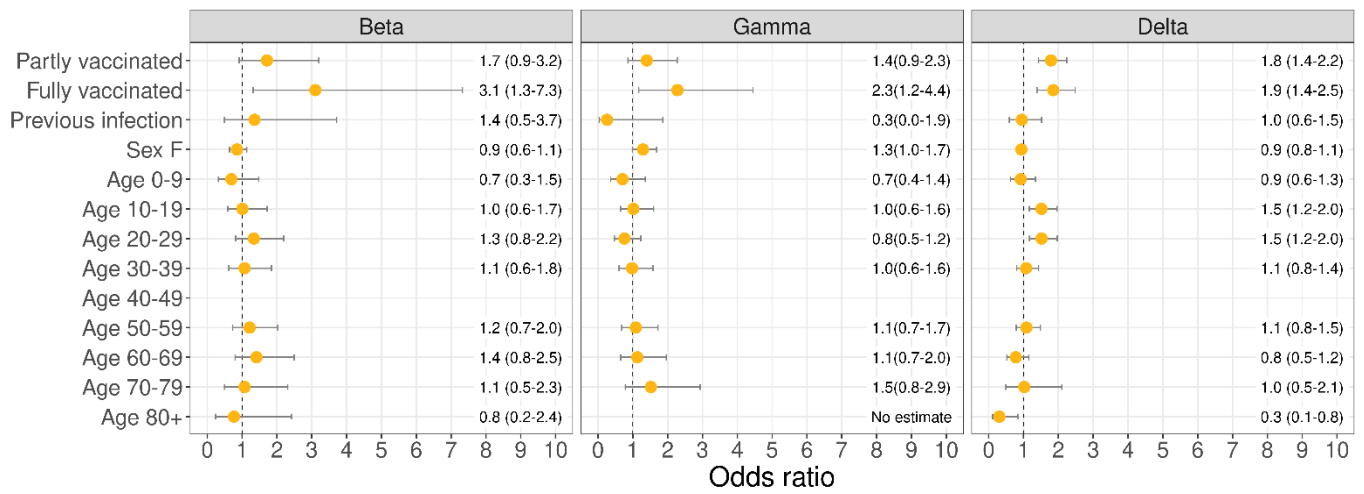

**Supplementary Figure 3** Odds ratios and 95% confidence intervals for the association between immune status and the Beta, Gamma or Delta variant with adjustment for week of sampling, 10-year age group (40-49 is reference) and sex.
